# Supplementary material
Source: PubMed Central journal article supplement (PMC4457027)

## Supplemental Figure Legends.

Supplemental Figure 1: I $\kappa$ B $\alpha$  over-expression does not induce expression of cRel dependent expression of NF $\kappa$ B target genes

(A) Relative I $\kappa$ B $\alpha$ , IL6, IL1 $\beta$  and IL12  $\beta$  mRNA expression in RAW 264.7 macrophages following transfection with I $\kappa$ B $\alpha$  expression plasmid. Values are means  $\pm$  SEM. n=9. (B) Relative LPS-induced (1  $\mu$ g/ml, 5 hrs), IL6, IL1 $\beta$ , and IL12 $\beta$  mRNA expression in RAW 264.7 macrophages (cont) and following transfection with I $\kappa$ B $\beta$  expression plasmid (I $\kappa$ B $\beta$ +). Values are means  $\pm$  SEM. n=3. \*, p<0.05 vs. untransfected LPS exposed.

Supplemental Figure 2: I $\kappa$ B $\beta$  over-expression induces expression of cRel but not p65

(A) Relative cRel and p65 mRNA expression in RAW 264.7 macrophages following transfection with I $\kappa$ B $\beta$  expression plasmid. Values are means  $\pm$  SEM. n=9. \*, p<0.05 vs. untransfected controls. (B) Representative Western blot showing whole cell lysate levels of I $\kappa$ B $\beta$ , c-Rel and p65 proteins in control RAW 264.7 (C) and in RAW 264.7 transfected with I $\kappa$ B $\beta$  expression plasmid (I $\kappa$ B $\beta$ +). Calnexin shown as loading control. Densitometric evaluation of protein expression normalized to control is provided.

Supplemental Figure 3: Unadjusted data presented in Figure 3E and 4C.

(A) Data presented in Figure 3E: Relative mRNA expression of target genes in RAW 264.7 macrophages following transfection with FLAG-tagged I $\kappa$ B $\beta$  expression plasmid (I $\kappa$ B $\beta$ +) or FLAG-tagged I $\kappa$ B $\beta$  expression plasmid and cRel siRNA (I $\kappa$ B $\beta$ +cRel-). Values are means+SEM. n=3. \*, p<0.05 vs. untransfected control; †, p<0.05 vs. I $\kappa$ B $\beta$  expression plasmid alone. (B) Data presented in Figure 4C: Fold-increase of gene expression of MnSOD, TNF $\alpha$ , I $\kappa$ B $\alpha$ , A20, RANTES, CXCL1, IP-10, IL1 $\beta$ , IL6 and IL12 $\beta$  following exposure to LPS (1  $\mu$ g/ml, 5 hrs), or LPS after transfection with I $\kappa$ B $\beta$  siRNA. Values are means  $\pm$  SEM. n=3/time point. \*, p<0.05 vs. unexposed control; †, p<0.05 vs. LPS-exposed.

Supplemental Figure 4: Expression of NF $\kappa$ B signaling pathway proteins is not different between AKBI and WT MEF

(A) Representative Western blot showing WT and AKBI lysate control levels of IKK $\alpha$ , IKK $\beta$ , IKK $\epsilon$ , I $\kappa$ B $\beta$ , I $\kappa$ B $\alpha$ , p65, p50, and c-Rel proteins with calnexin as loading control. Densitometric evaluation of protein expression normalized to WT is provided. (B) Relative IKK $\alpha$ , IKK $\beta$ , IKK $\epsilon$ , I $\kappa$ B $\beta$ , I $\kappa$ B $\alpha$ , p50, c-Rel, TLR4 and MyD88 mRNA levels. Values are means  $\pm$  SEM. n=8. \*, p<0.05 vs. WT.

# Supplemental Figure 1

A.

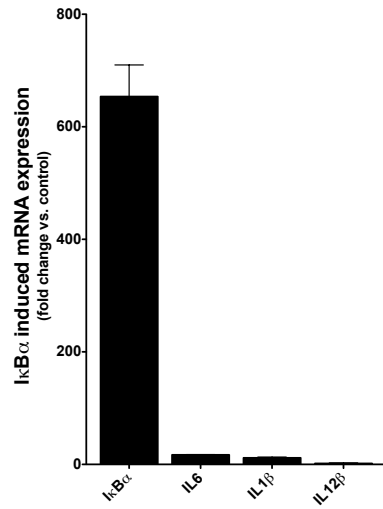

B.

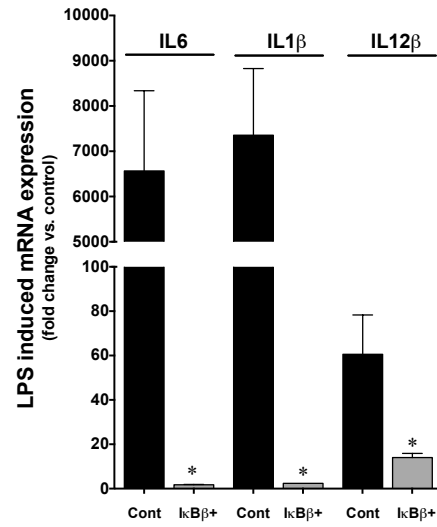

# Supplemental Figure 2

**A.**

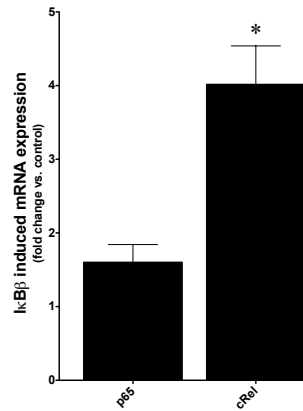

**B.**

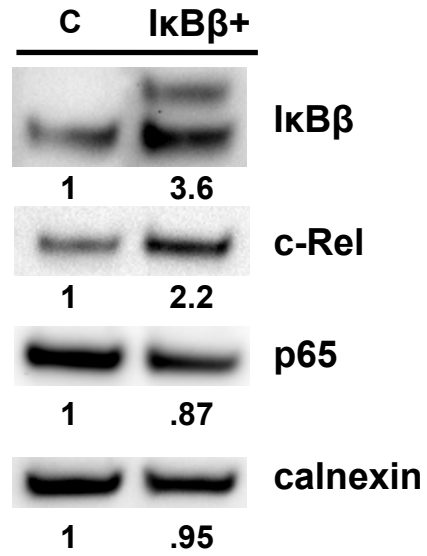

# Supplemental Figure 3

## A.

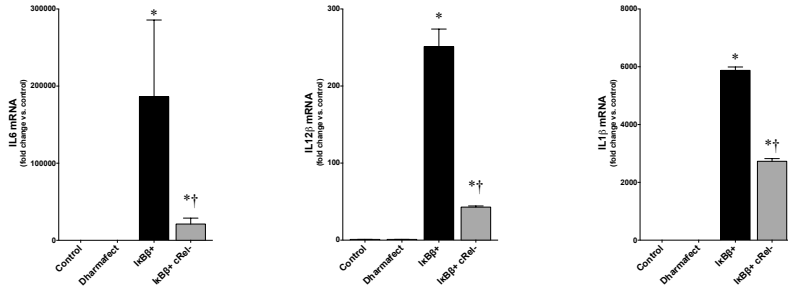

## B.

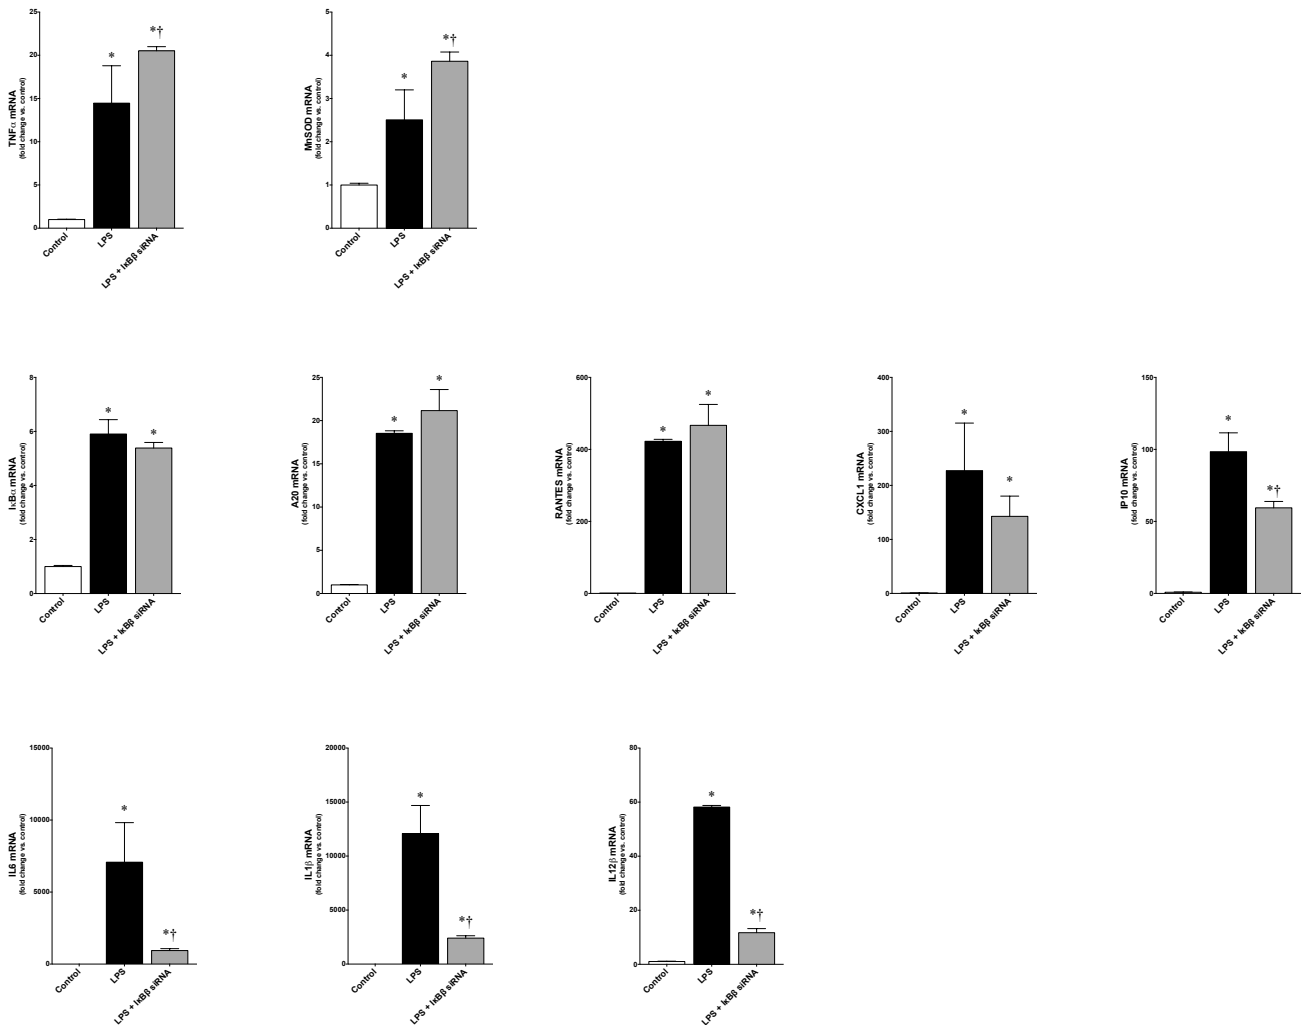

# Supplemental Figure 4

**A.**

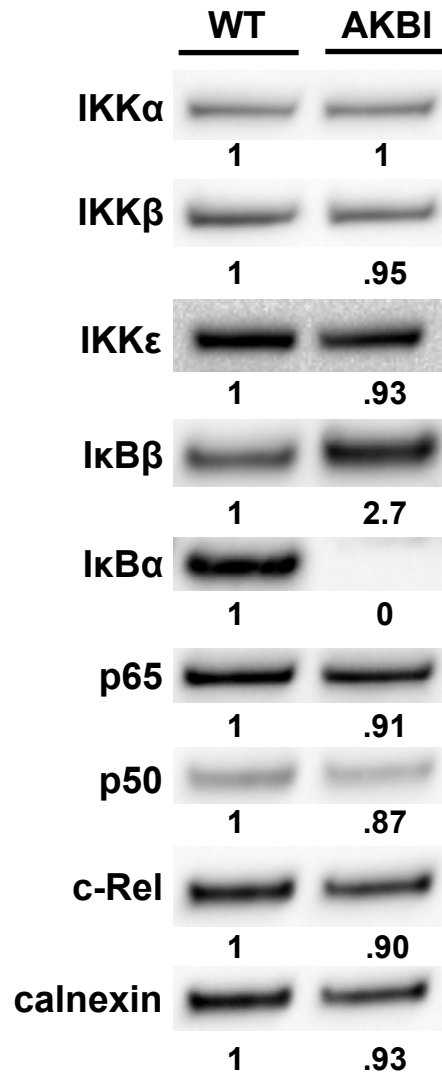

**B.**

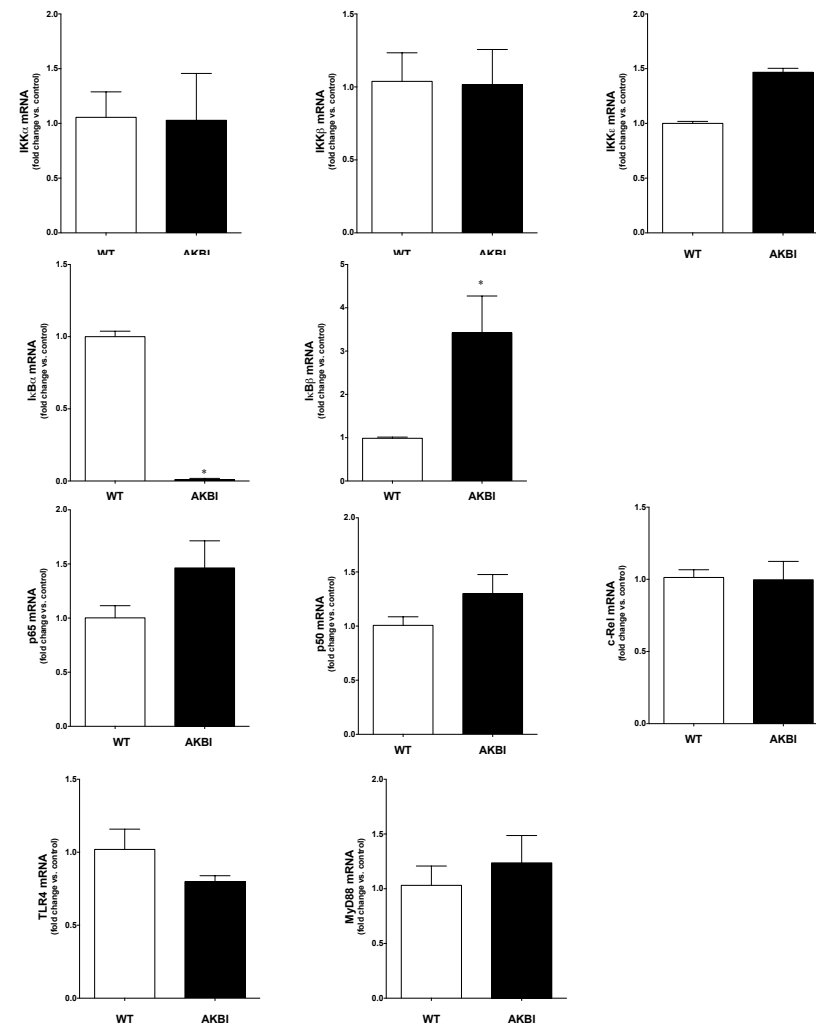

Supplement: supp_128.11.2143_JCS168351.pdf [file supp_128.11.2143_JCS168351.pdf]
